# Supplementary material for: Role of polycrystalline F–SnO2 substrate topography in formation mechanism and morphology of Pt nanoparticles by solid-state-dewetting
Source: Royal Society of Chemistry journal article supplement (doi:10.1039/d5nr00729a), 2025-01-01
Supplement: d5nr00729a1.pdf [file d5nr00729a1.pdf]

## Supporting Information

### **Role of Polycrystalline F-SnO<sub>2</sub> Substrate Topography on Formation Mechanism and Morphology of Pt Nanoparticles by Solid-State-Dewetting**

M. Dierner<sup>a</sup>, S. Peters<sup>a</sup>, M. Wu<sup>a</sup>, C. Rubach<sup>a</sup>, S. Harsha<sup>b</sup>, R. K. Sharma<sup>b</sup>,  
Z. Y. Siah<sup>c</sup>, M. T. Abudukade<sup>b</sup>, S. Ng<sup>c</sup>, E. Spiecker<sup>a</sup>, M. Altomare<sup>b</sup> and J. Will<sup>a\*</sup>

<sup>a</sup>Institute of Micro- and Nanostructure Research & Center for Nanoanalysis and Electron  
Microscopy (CENEM), Friedrich-Alexander-Universität Erlangen-Nürnberg, IZNF,  
Cauerstraße 3, 91058 Erlangen, Germany

<sup>b</sup>MESA+ Institute of Nanotechnology, University of Twente, Enschede 7500AE, The  
Netherlands

<sup>c</sup>Department of Chemistry and Pharmacy, Friedrich-Alexander-Universität Erlangen-  
Nürnberg, Egerlandstraße 3, 91058 Erlangen, Germany\*Corresponding Authors

\*Corresponding Author

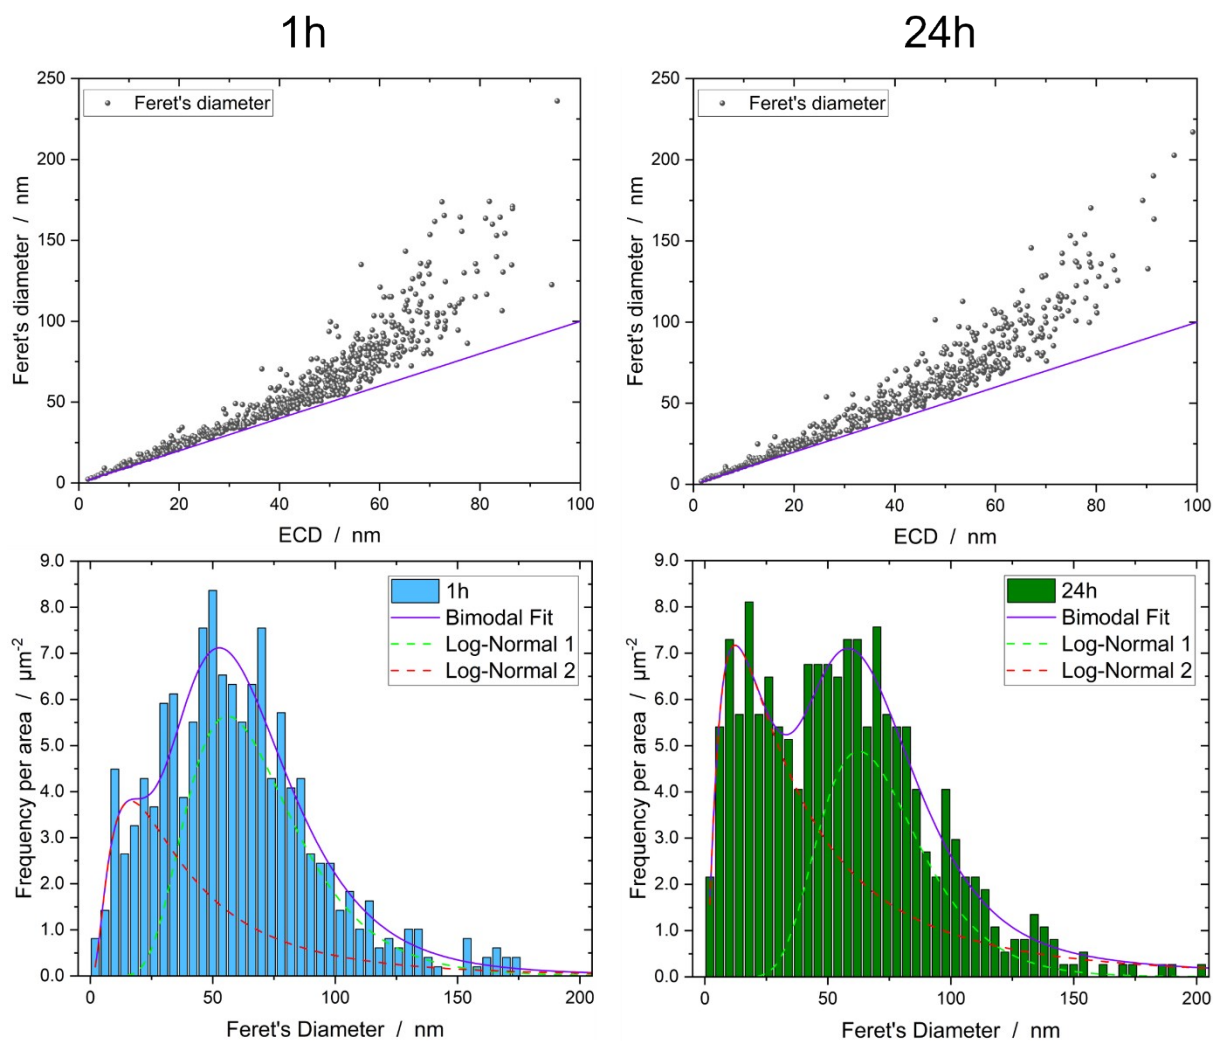

Fig. S 1: Top: Feret's diameter ( $D_f$ ) versus the equivalent circle diameter (ECD). The deviation from a perfect circular particle is depicted by the deviation of the Feret's diameter (scattered data) from the straight line. This comparison demonstrates that the ECD is a suitable estimate of particle size, particularly for the smaller particles, as only minor deviations are observed. Bottom: Particle size distribution using Feret's diameter.

Table S. 1: Fit parameter from the particle size distribution using Feret's diameter, where  $x_c$  presents the mode of the log normal fit (Particle size with highest frequency).

|     | $x_c^{\text{small}} / \text{nm}$ | $x_c^{\text{large}} / \text{nm}$ | Fraction small NPs / % |
|-----|----------------------------------|----------------------------------|------------------------|
| 1h  | $16.5 \pm 8.5$                   | $56.0 \pm 2.5$                   | 24.6                   |
| 24h | $12.3 \pm 2.9$                   | $62.6 \pm 1.9$                   | 31.0                   |

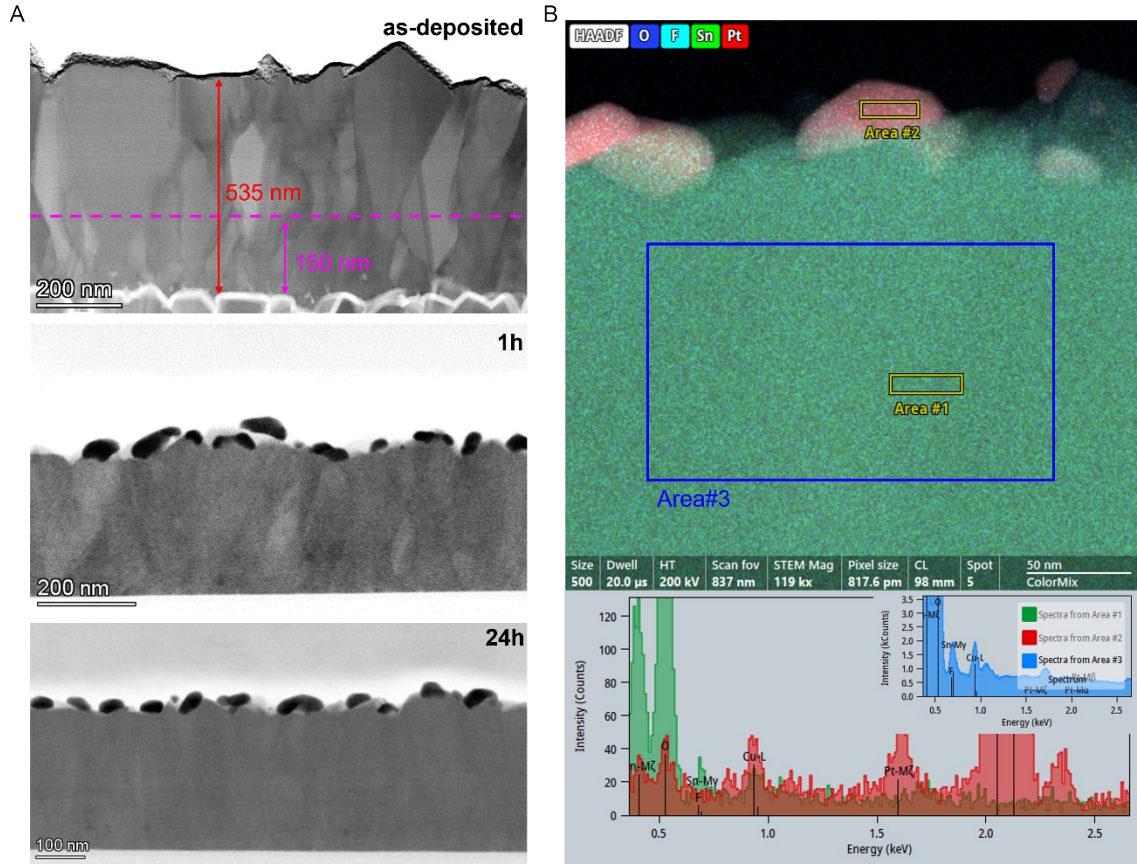

Fig. S 2: (A) Cross-sectional FIB lamellae of the FTO before (top) annealing and after annealing for 1h (middle) and 24h (bottom). The images clearly reveal that no fracture or morphological changes have occurred during annealing. (B) STEM EDXS of the Pt-FTO structure. While F is detected within the substrate, no F is present within the Pt NPs. For comparison, the same small area was used for generating the spectrum (bottom) than in the particle.

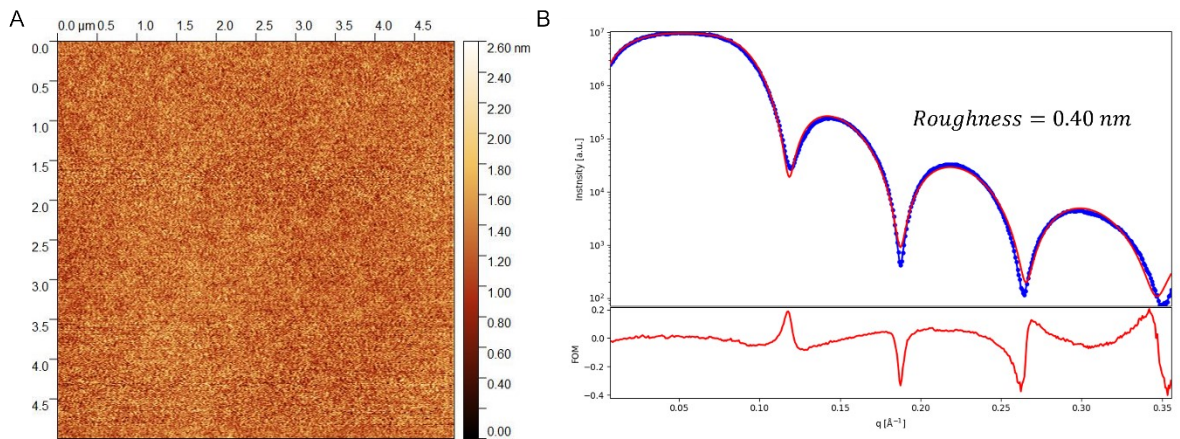

Fig. S 3: (A) AFM measurement of an ~5 nm thin as-deposited Pt film deposited on SiO<sub>2</sub>-Wafer. The sputter deposition parameters were identical to the one used for the 5 nm Pt films deposited on FTO. The root-mean-square (RMS) roughness of the sample is determined to be 0.3 nm. (B) XRR measurement on a ~7.5 nm thin Pt film deposited on SiO<sub>2</sub>. The roughness value is determined to be 0.4 nm.

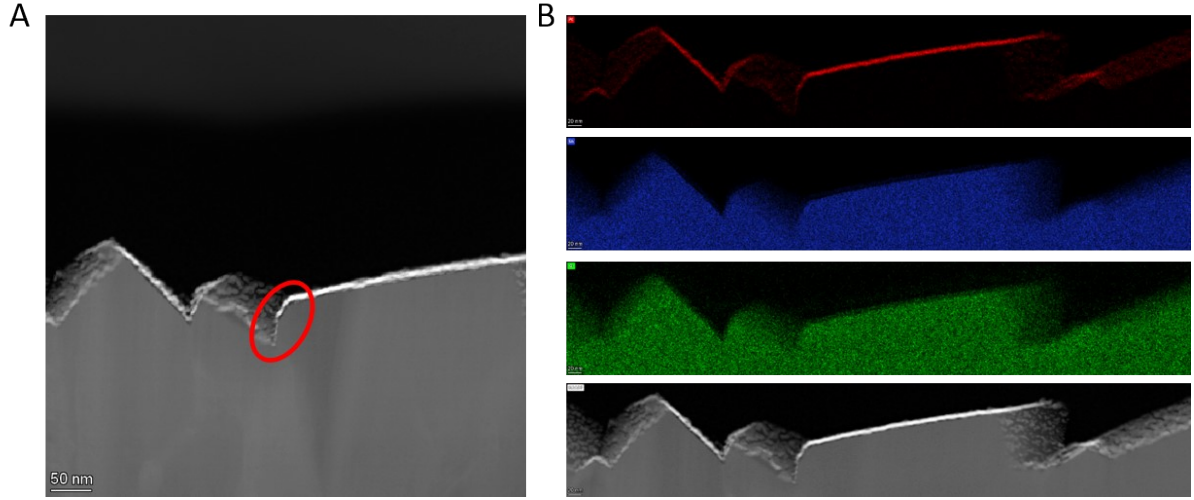

Fig. S 4: FIB cross-section of the as-deposited Pt-FTO sample, showing thinner Pt-films in steep regions

### **Approximation of shadowing effect during PVD**

First, to consider the inclination of surfaces at magnetron sputtering, the cosine law of reduction can be used to approximate the shadowing effect related to the inclination angle:

$$t_{flat} = t_{inclined} \cdot \cos(\beta)$$

where  $t_{flat}$  is the film thickness at flat terraces,  $t_{inclined}$  the film thickness at inclined surfaces and  $\beta$  the inclination angle.

In Fig.S2 the calculations are shown for inclination angles ranging from  $0^\circ$  to  $90^\circ$ .

Second, the aspect ratio (AR) of the valleys plays a significant role for shadowing effects, which is determined as follows:

$$AR = \frac{d_{valley}}{w_{valley}}$$

where  $d_{valley}$  is the depth and  $w_{valley}$  the width of the valleys.

If the AR is  $\ll 1$  the shadowing effect would be small. With increasing AR, the shadowing effect gets stronger [22], [23].

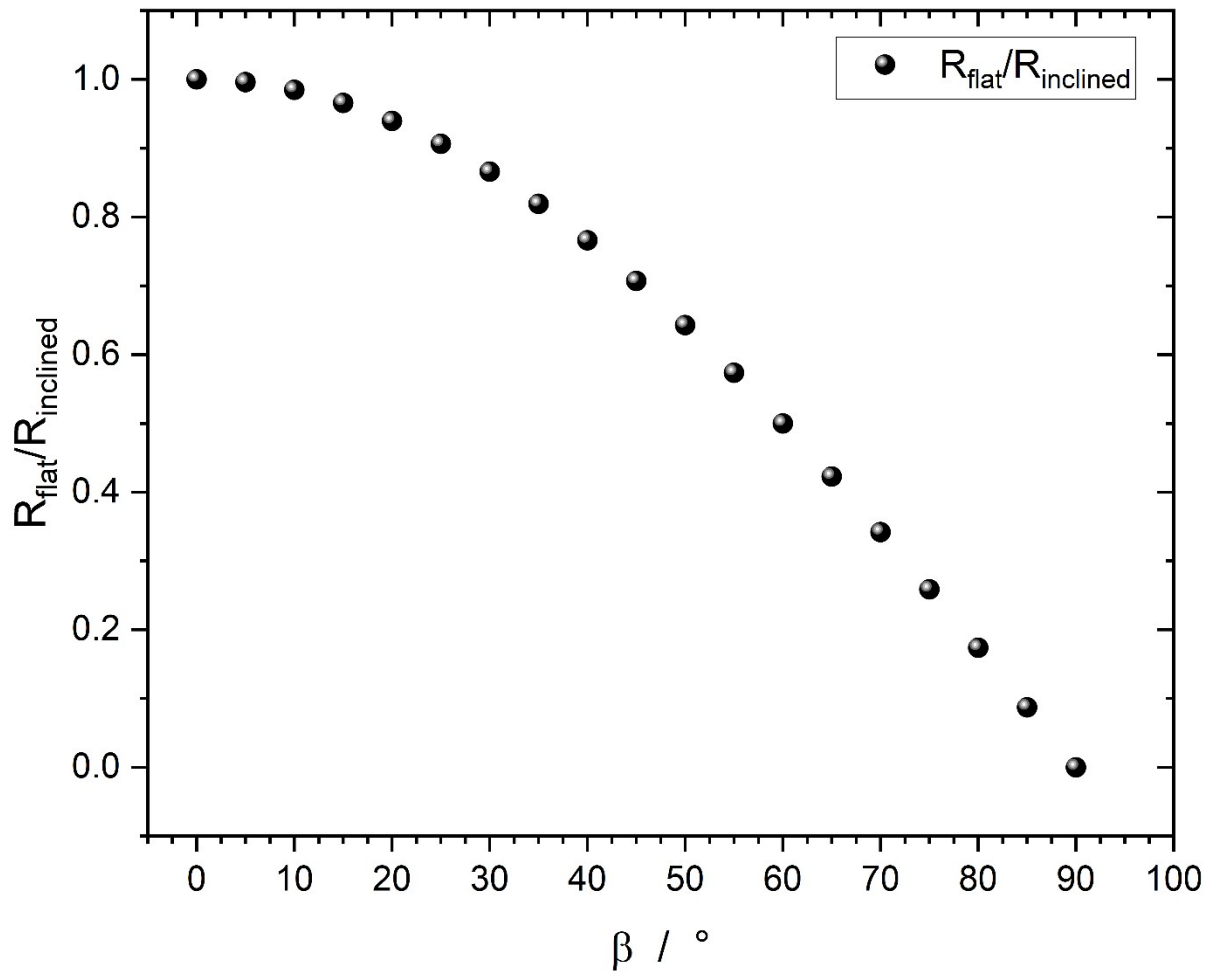

Fig. S 5: Cosine law of reduction effect on the film thickness of sputtered films
